# Supplementary material for: Agarose Gel Electrophoresis-Based RAPD-PCR—An Optimization of the Conditions to Rapidly Detect Similarity of the Alert Pathogens for the Purpose of Epidemiological Studies
Source: MDPI journal article supplement (doi:10.3390/gels8120760), 2022-11-22

## Supplementary material

# Agarose gel electrophoresis-based RAPD-PCR—An optimization of the conditions to rapidly detect similarity of the alert pathogens for the purpose of epidemiological studies

Tomasz Bogiel <sup>1,2</sup>, Agnieszka Mikucka <sup>1,2</sup> and Piotr Kanarek <sup>3</sup>

<sup>1</sup> Microbiology Department, Ludwik Rydygier Collegium Medicum in Bydgoszcz, Nicolaus Copernicus University in Torun, Poland; a.mikucka@cm.umk.pl (A.M.)

<sup>2</sup> Clinical Microbiology Department dr Antoni Jurasz University Hospital No 1 in Bydgoszcz, Poland;

<sup>3</sup> Department of Microbiology and Food Technology, Faculty of Agriculture and Biotechnology, Bydgoszcz University of Science and Technology, Bydgoszcz, Poland; piokan004@pbs.edu.pl (P.K.)

\* Correspondence: t.bogiel@cm.umk.pl; Tel.: +48 52 585 44 80

**Table S1.** The detailed origin of *E. faecium* strains included into the study ( $n = 19$ ) and their susceptibility profiles

| Strain No. | Patient No. | Specimen type          | Department /unit                                                                          | Ampicillin | Amoxicillin/clavulanate | Piperacillin | Piperacillin/tazobactam | Imipenem | Gentamicin | Streptomycin | Tigecycline | Vancomycin | Teicoplanin | Linezolid |
|------------|-------------|------------------------|-------------------------------------------------------------------------------------------|------------|-------------------------|--------------|-------------------------|----------|------------|--------------|-------------|------------|-------------|-----------|
| 1          | 1           | Skin swab              | Department of Anaesthesiology and Intensive Care                                          | R          | R                       | R            | R                       | R        | S          | R            | S           | R          | R           | S         |
| 2          | 1           | Wound swab             | Department of Anaesthesiology and Intensive Care                                          | R          | R                       | R            | R                       | R        | S          | R            | S           | R          | R           | S         |
| 3          | 2           | Bronchoalveolar lavage | Department of Anaesthesiology and Intensive Care                                          | R          | R                       | R            | R                       | R        | R          | R            | S           | R          | R           | S         |
| 4          | 3           | Wound swab             | Department of Anaesthesiology and Intensive Care                                          | R          | R                       | R            | R                       | R        | R          | R            | S           | R          | R           | S         |
| 5          | 4           | Peritoneal fluid       | Clinical Unit of Anaesthesiology and Intensive Care with Cardiac Anaesthesiology Division | R          | R                       | R            | R                       | R        | R          | R            | S           | R          | R           | S         |

|                         |   |                  |                                                                                           |     |     |     |     |     |      |     |     |     |     |     |
|-------------------------|---|------------------|-------------------------------------------------------------------------------------------|-----|-----|-----|-----|-----|------|-----|-----|-----|-----|-----|
| 6                       | 4 | Rectal swab      | Clinical Unit of Anaesthesiology and Intensive Care with Cardiac Anaesthesiology Division | R   | R   | R   | R   | R   | R    | R   | S   | R   | R   | S   |
| 7                       | 4 | Skin swab        | Clinical Unit of Anaesthesiology and Intensive Care with Cardiac Anaesthesiology Division | R   | R   | R   | R   | R   | R    | R   | S   | R   | R   | S   |
| 8                       | 5 | Rectal swab      | Clinical Unit of Anaesthesiology and Intensive Care with Cardiac Anaesthesiology Division | R   | R   | R   | R   | R   | R    | R   | S   | R   | R   | S   |
| 9                       | 5 | Skin swab        | Clinical Unit of Anaesthesiology and Intensive Care with Cardiac Anaesthesiology Division | R   | R   | R   | R   | R   | R    | R   | S   | R   | R   | S   |
| 10                      | 2 | Wound swab       | Department of Anaesthesiology and Intensive Care                                          | R   | R   | R   | R   | R   | R    | R   | S   | R   | R   | S   |
| 11                      | 2 | Throat swab      | Department of Anaesthesiology and Intensive Care                                          | R   | R   | R   | R   | R   | R    | R   | S   | R   | R   | S   |
| 12                      | 2 | Skin swab        | Department of Anaesthesiology and Intensive Care                                          | R   | R   | R   | R   | R   | R    | R   | S   | R   | R   | S   |
| 13                      | 2 | Rectal swab      | Department of Anaesthesiology and Intensive Care                                          | R   | R   | R   | R   | R   | R    | R   | S   | R   | R   | S   |
| 14                      | 6 | Rectal swab      | Clinical Unit of Anaesthesiology and Intensive Care with Cardiac Anaesthesiology Division | R   | R   | R   | R   | R   | R    | R   | S   | R   | R   | S   |
| 15                      | 6 | Skin swab        | Clinical Unit of Anaesthesiology and Intensive Care with Cardiac Anaesthesiology Division | R   | R   | R   | R   | R   | R    | R   | S   | R   | R   | S   |
| 16                      | 7 | Rectal swab      | Department of Anaesthesiology and Intensive Care                                          | R   | R   | R   | R   | R   | R    | R   | S   | R   | R   | S   |
| 17                      | 7 | Skin swab        | Department of Anaesthesiology and Intensive Care                                          | R   | R   | R   | R   | R   | R    | R   | S   | R   | R   | S   |
| 18                      | 8 | Peritoneal fluid | Department of Anaesthesiology and Intensive Care                                          | R   | R   | R   | R   | R   | S    | R   | S   | R   | R   | S   |
| 19                      | 9 | Skin swab        | Department of Anaesthesiology and Intensive Care                                          | R   | R   | R   | R   | R   | R    | R   | S   | R   | R   | S   |
| Resistant strains [%]   |   |                  |                                                                                           | 100 | 100 | 100 | 100 | 100 | 84.2 | 100 | 0   | 100 | 100 | 0   |
| Susceptible strains [%] |   |                  |                                                                                           | 0   | 0   | 0   | 0   | 0   | 15.8 | 0   | 100 | 0   | 0   | 100 |

R – resistant strains, S – sensitive strains

**Figure S1.** Agarose gel electrophoresis of RAPD-PCR amplification products separated under the following parameters (arbitrarily chosen DNA samples, treated as “a blind control”)

A. AB106 primer, 9 V/cm, 90 min, 1.5% agarose (the first attempt)

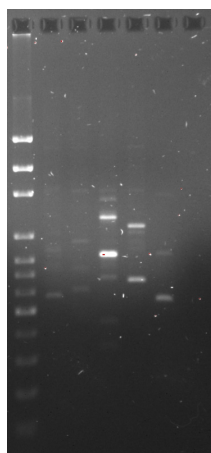

B. AB111 primer, 9 V/cm, 90 min, 1.5% agarose (the second attempt)

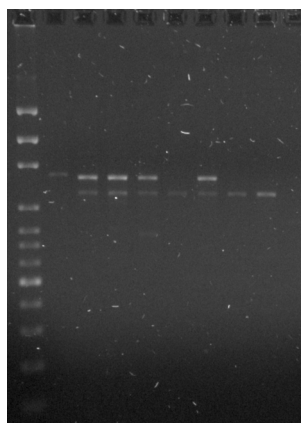

C. AP4 primer, 9 V/cm, 90 min, 1% agarose (the third attempt)

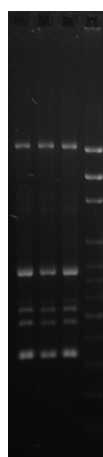

**Figure S2.** Agarose gel electrophoresis of RAPD-PCR amplification products with AP4 and the second primer under the following parameters (1-19 – numbers of the strains, K(-) – negative control, LL – DNA size marker 100 – 3.000 bp)

A. combination of AP4 and 208 primers, 12 V/cm, 135 min, 2.7% agarose

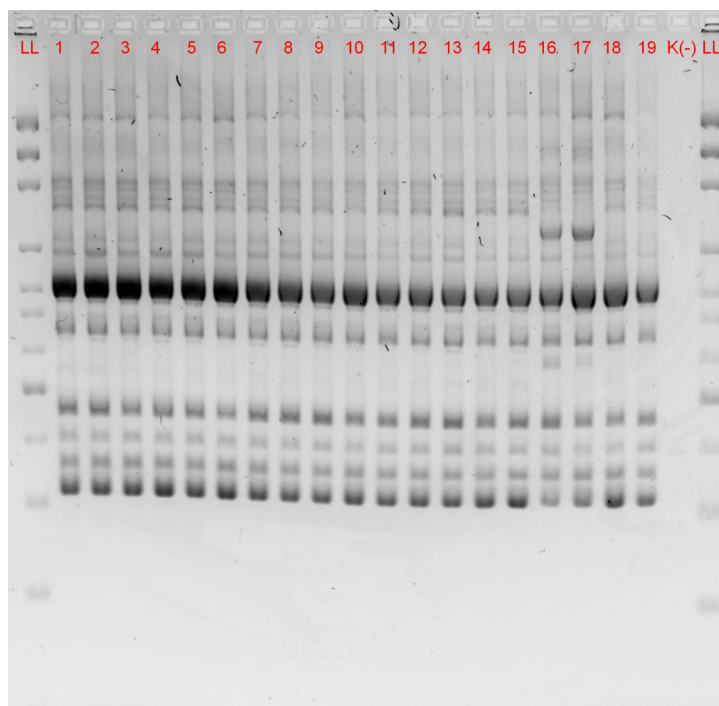

B. combination of AP4 and AP5 primers, 9 V/cm, 135 min, 2.5% agarose

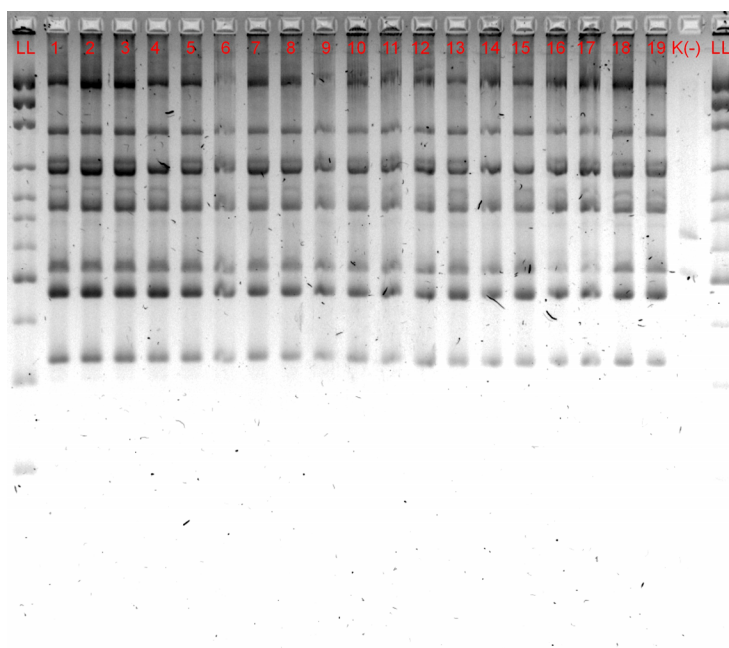

C. combination of AP4 and AB106 primers, 9 V/cm, 90 min, 1.2% agarose

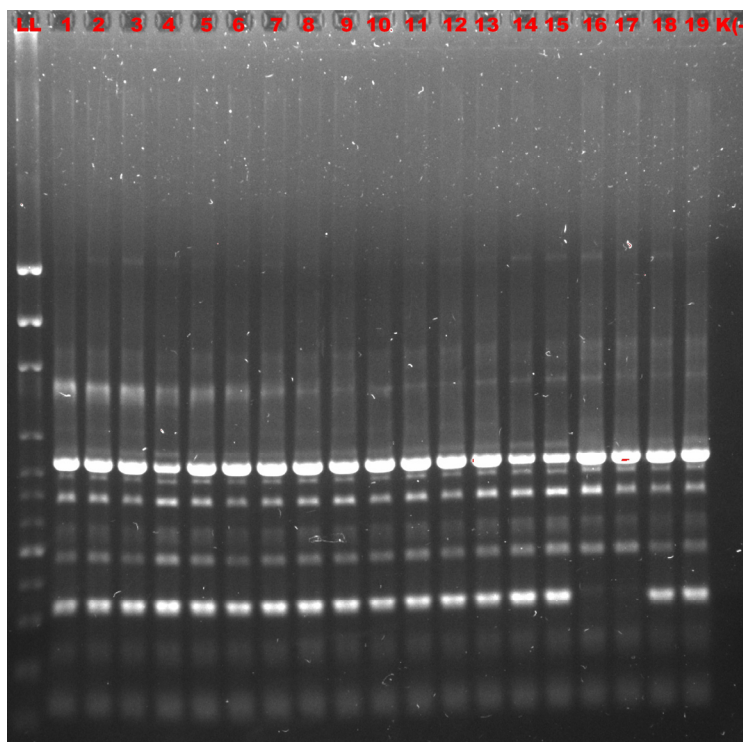

D. combination of AP4 and AB111 primers, 9V/cm, 90 min, 1.2% agarose

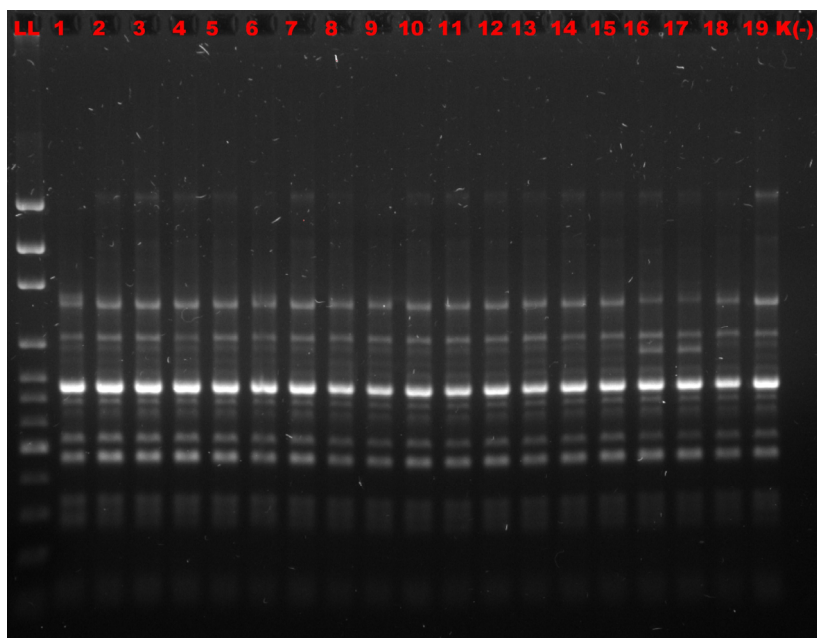

E. combination of AP4 and ERIC1 primers, 120 V – 45 min and 9V/cm - 45 min, 2.0% agarose

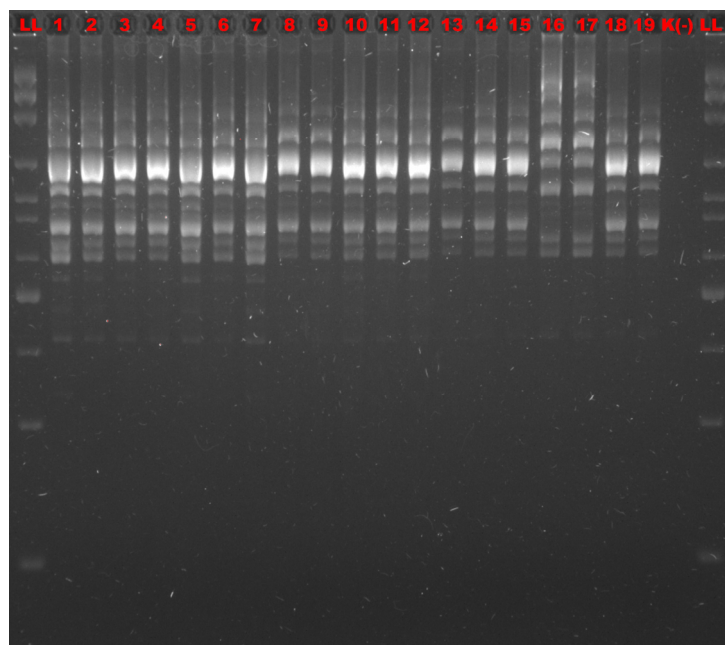

F. combination of AP4 and ERIC1 primers, 9V/cm, 75 min, 1.2% agarose

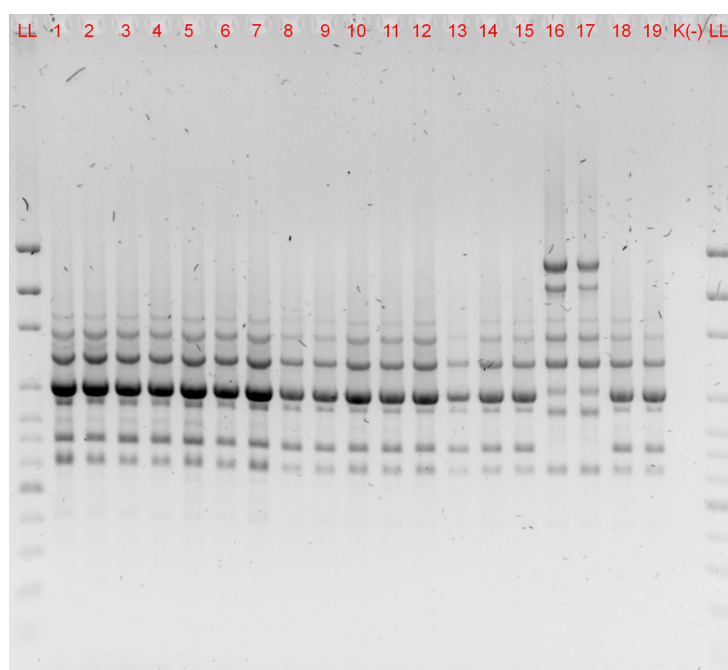

**Figure S3.** Agarose gel electrophoresis of RAPD-PCR amplification products with 208 and 272 primers under the following parameters (1-19 – numbers of the strains, K(-) – negative control, LL – DNA size marker 100 – 3.000 bp)

A. 208 primer, 9 V/cm, 90 min, 1.5% agarose

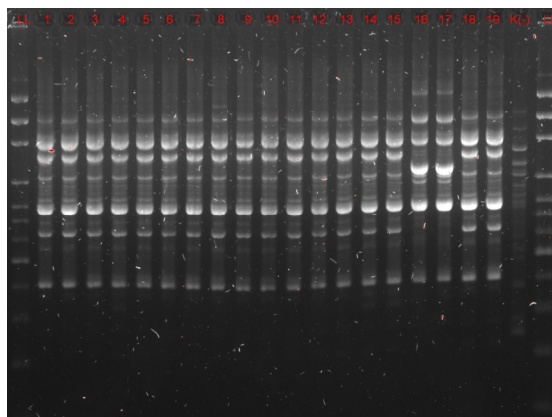

B. 272 primer, 9 V/cm, 135 min, 2.5% agarose

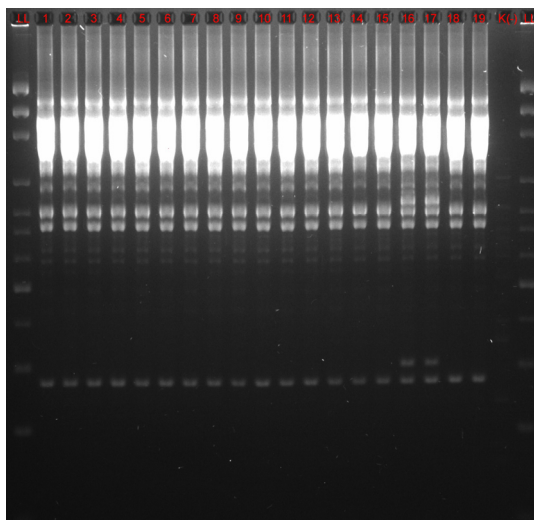

C. 272 primer, 9 V/cm, 150 min, 2.5% agarose

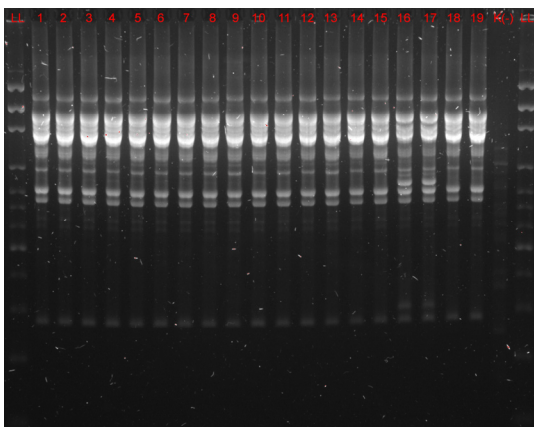

**Figure S4.** Agarose gel electrophoresis of RAPD-PCR amplification products with AP3 primer under the following parameters (1-19 – numbers of the strains, K(-) – negative control, LL – DNA size marker 100 – 3.000 bp)

AP3 primer, 9 V/cm, 90 min, 1.5% agarose

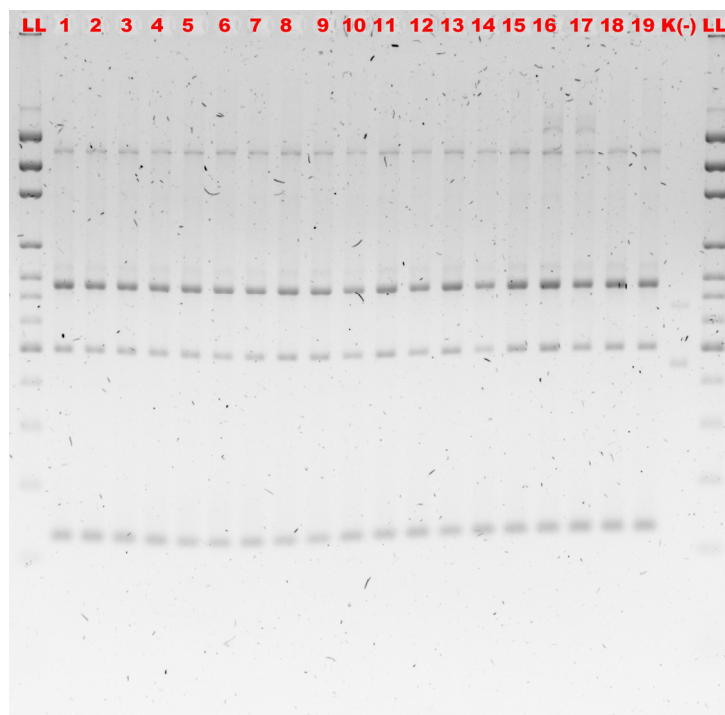

**Figure S5.** Agarose gel electrophoresis of RAPD-PCR amplification products with AB106 and AB111 primers under the following parameters (1-19 – numbers of the strains, K(-) – negative control, LL – DNA size marker 100 – 3.000 bp)

A. AB106 primer, 12 V/cm, 105 min, 2.0% agarose

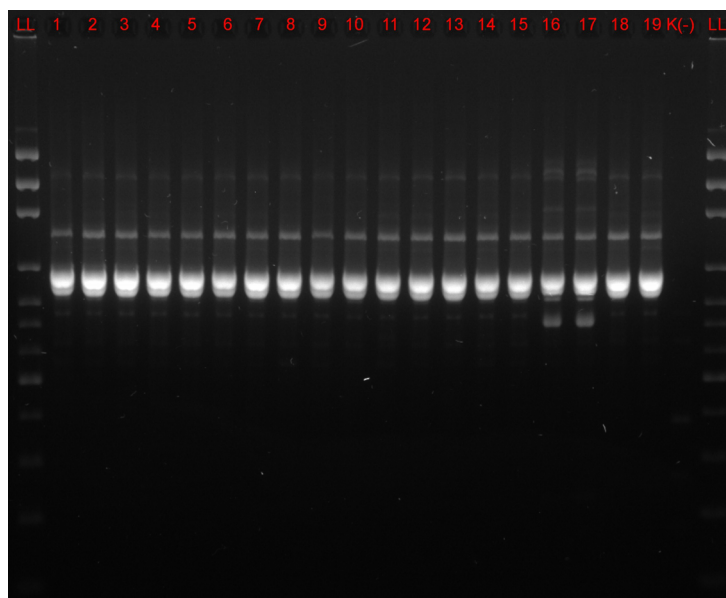

B. AB111 primer, 12 V/cm, 90 min, 2.0% agarose

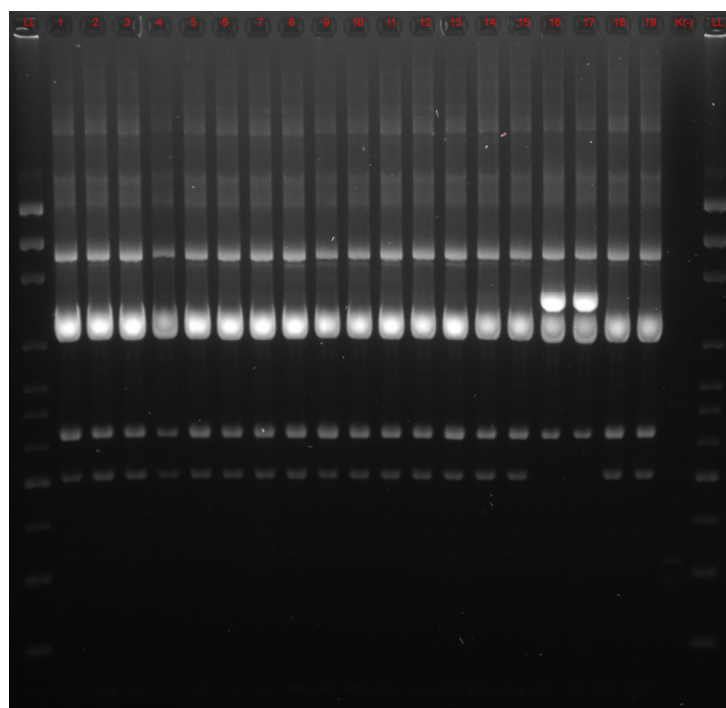

**Figure S6.** Agarose gel electrophoresis of RAPD-PCR amplification products with ARB11 and ERIC1 primers under the following parameters (1-19 – numbers of the strains, K(-) – negative control, LL – DNA size marker 100 – 3.000 bp)

A. ARB11 primer, 9 V/cm, 90 min, 1.2% agarose

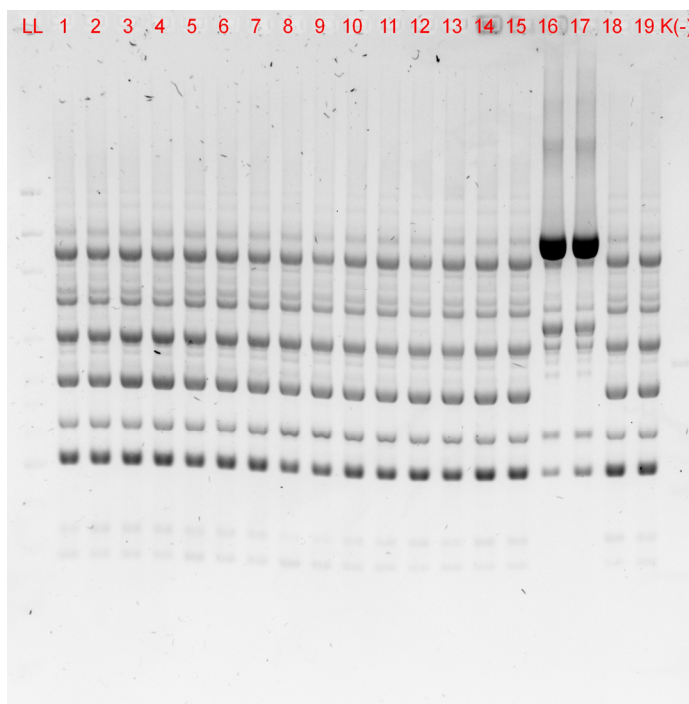

B. ERIC1 primer, 9 V/cm, 90 min, 1.0% agarose

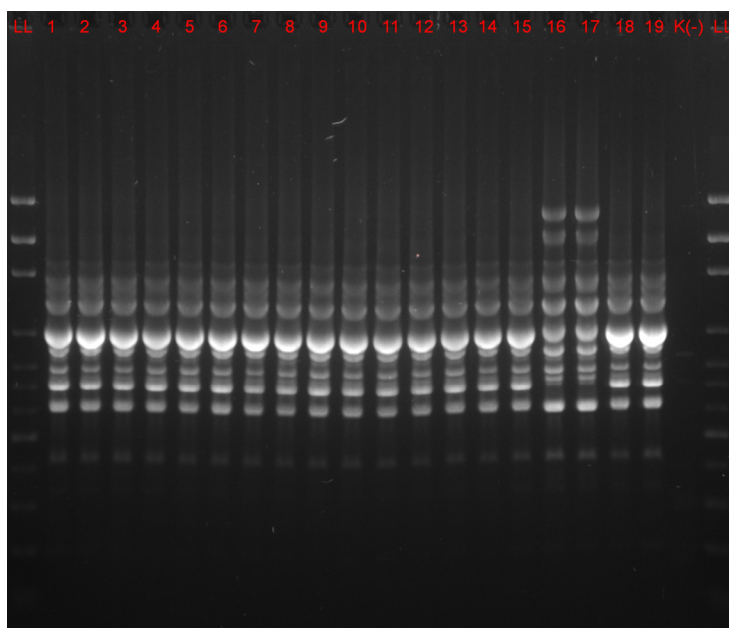

Supplement: s1 [file s1]
